# Supplementary material
Source: PubMed Central journal article supplement (PMC7418220)
Supplement: NIHMS1609902-supplement-Online_Supplement.pdf [file NIHMS1609902-supplement-Online_Supplement.pdf]

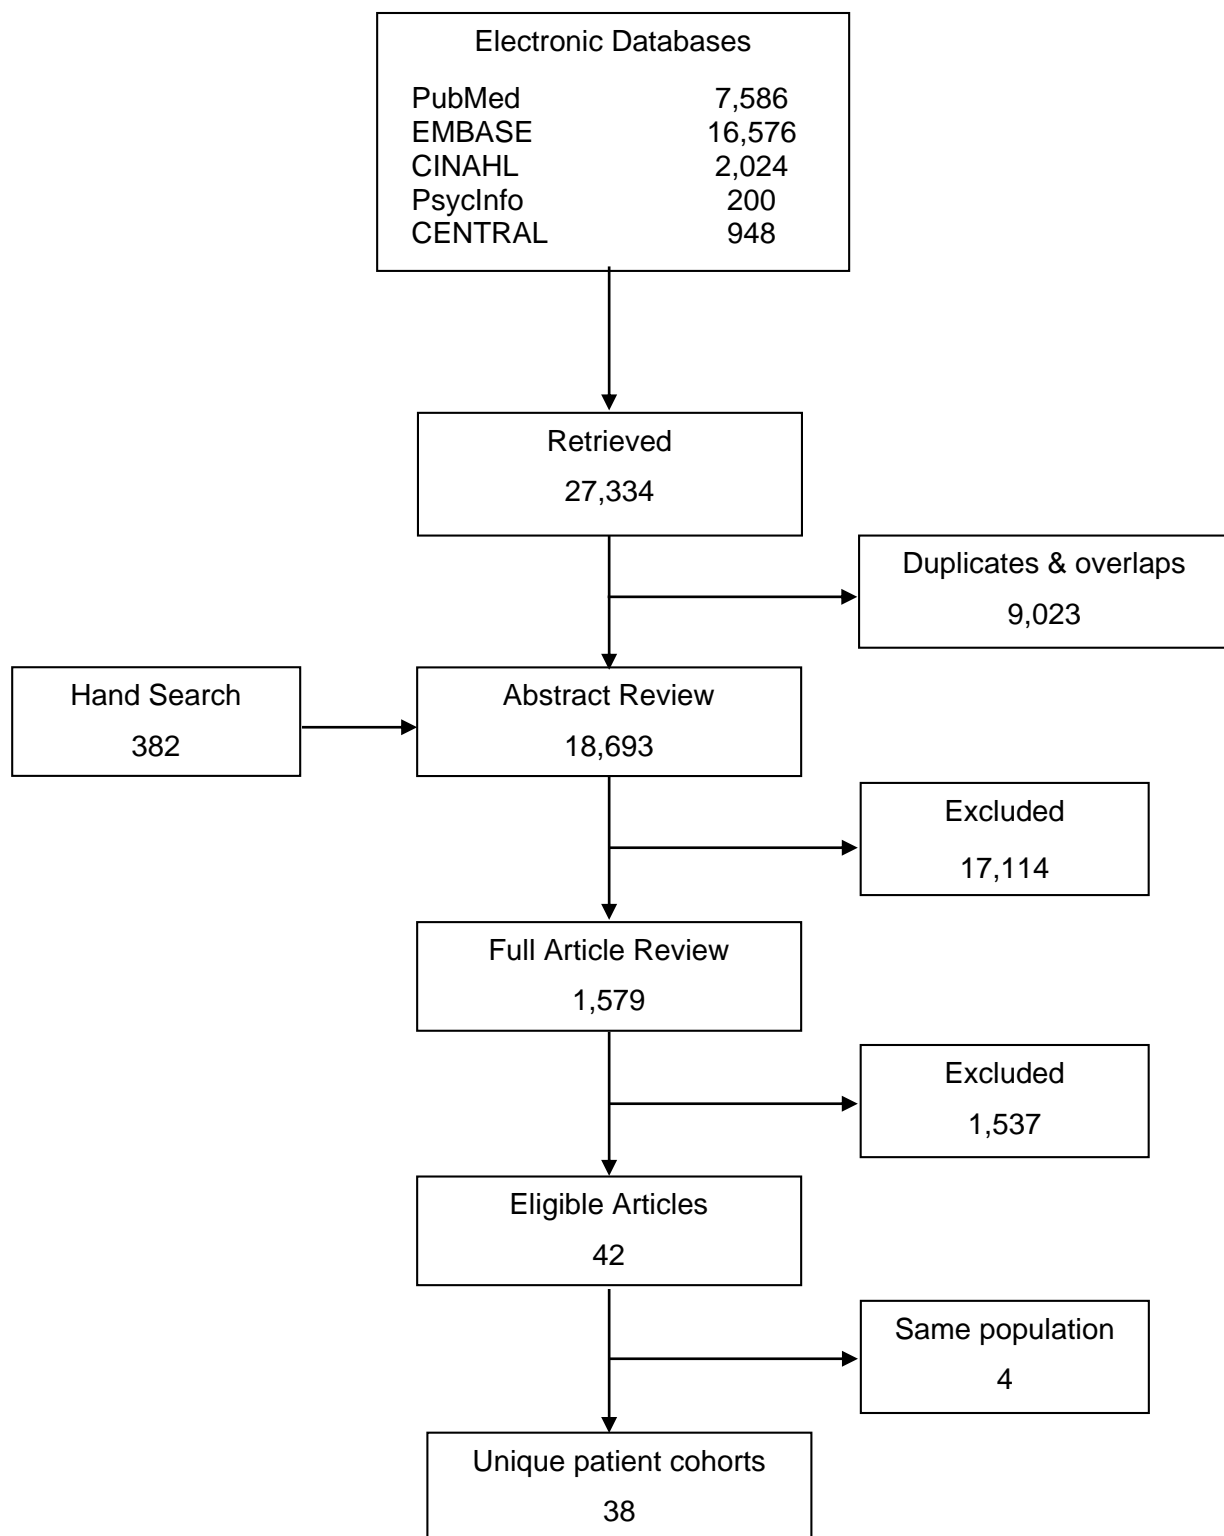

**Figure S1: Flow chart for identifying eligible studies.**

Abbreviations: CINAHL, Cumulative Index of Nursing and Allied Health Literature; CENTRAL, Cochrane Controlled Trials Registry.

**Table S1: Search Terms and Strategies**

| Database | Search Terms                                                                                                                                                                                                                                                                                                                                                                                                                                                                                                                                                                                                                                                                                                                                                                                                                                                               | Results                                       |
|----------|----------------------------------------------------------------------------------------------------------------------------------------------------------------------------------------------------------------------------------------------------------------------------------------------------------------------------------------------------------------------------------------------------------------------------------------------------------------------------------------------------------------------------------------------------------------------------------------------------------------------------------------------------------------------------------------------------------------------------------------------------------------------------------------------------------------------------------------------------------------------------|-----------------------------------------------|
| Pubmed   | (intensive care[tiab] OR "intensive care"[MeSH Terms] OR intensive therapy[tiab] OR high dependency[tiab] OR critical care[tiab] OR "critical care"[MeSH Terms] OR intermediate care[tiab] OR step-up care[tiab] OR step-down care[tiab] OR respiratory distress syndrome[tiab] OR acute lung injury[tiab]) AND (outcome measure[tiab] OR "outcome assessment (health care)"[MeSH Terms] OR follow-up[tiab] OR "follow-up studies"[MeSH Terms] OR health status[tiab] OR "health status"[MeSH Terms] OR functional status[tiab] OR clinical outcome[tiab]) AND (organ failure[tiab] OR "multiple organ failure"[MeSH Terms] OR organ dysfunction[tiab] OR sequelae[tiab] OR quality of life[tiab] OR "quality of life"[MeSH Terms] OR impairment[tiab] OR morbidity[tiab] OR "morbidity"[MeSH Terms]) NOT (animals[mh] NOT humans[mh])<br>Limits: 1970 – present           | Search 1:<br>6,391<br><br>Search 2:<br>1,195  |
| Embase   | ('intensive care'/exp OR 'intensive care':ti,ab OR 'intensive therapy':ti,ab OR 'high dependency':ti,ab OR 'critical care':ti,ab OR 'critical care':ti,ab OR 'intermediate care':ti,ab OR 'step-up care':ti,ab OR 'step-down care':ti,ab OR 'respiratory distress syndrome':ti,ab OR 'acute lung injury':ti,ab) AND ('outcome measure':ti,ab OR 'outcome assessment'/exp OR 'follow up':ti,ab OR 'follow up'/exp OR 'health status':ti,ab OR 'health status'/de OR 'functional status':ti,ab OR 'clinical outcome':ti,ab) AND ('organ failure':ti,ab OR 'multiple organ failure'/exp OR 'organ dysfunction':ti,ab OR 'multiple organ failure':ti,ab OR 'sequelae':ti,ab OR 'quality of life'/exp OR 'quality of life':ti,ab OR 'impairment':ti,ab OR 'morbidity':ti,ab OR 'morbidity'/exp) NOT ('animal'/exp NOT ('animal'/exp AND 'human'/exp))<br>Limits: 1970 – present | Search 1:<br>11,246<br><br>Search 2:<br>5,330 |
| CINAHL   | (MH "intensive care units+" OR "intensive care" OR "intensive therapy" OR "high dependency" OR MH "critical care" OR "critical care" OR "intermediate care" OR "step-up care" OR "step-down care" OR "respiratory distress syndrome" OR "acute lung injury") AND ("outcome measure" OR MH "outcome assessment" OR "follow up" OR MH "prospective studies" OR MH "health status" OR "health status" OR "functional status" OR "clinical outcome") AND ("organ failure" OR "multiple organ failure" OR "organ dysfunction" OR MH "multiple organ dysfunction syndrome" OR "sequelae" OR "quality of life" OR MH "quality of life" OR "impairment" OR "morbidity" OR MH "morbidity")                                                                                                                                                                                          | Search 1:<br>1,677<br><br>Search 2:<br>232    |
| PsycInfo | (DE "intensive care" OR "intensive care" OR "intensive therapy" OR "high dependency" OR "critical care" OR "intermediate care" OR "step-up care" OR "step-down care" OR "respiratory distress syndrome" OR "acute lung injury") AND ("outcome measure" OR "outcome assessment" OR "follow up" OR DE "Followup Studies" OR "health status" OR "functional status" OR "clinical outcome") AND ("organ failure" OR "multiple organ failure" OR "organ dysfunction" OR "sequelae" OR "quality of life" OR DE "quality of life" OR "impairment" OR DE "morbidity" OR "morbidity")                                                                                                                                                                                                                                                                                               | Search 1:<br>159<br><br>Search 2:<br>41       |

**Table S2. Risk of Bias Assessment for Observational Studies, Adapted from the Newcastle Ottawa**

| Study                        | Representativeness of exposed cohort <sup>a</sup> | Selection of non-exposed cohort <sup>b</sup> | Ascertainment of exposure (s) <sup>c</sup> | Demonstration that outcome was not present at start <sup>d</sup> | Comparability of cohorts <sup>e</sup> | Assessment of outcome | Was follow-up long enough? <sup>f</sup> | Adequacy of follow-up <sup>g</sup> |
|------------------------------|---------------------------------------------------|----------------------------------------------|--------------------------------------------|------------------------------------------------------------------|---------------------------------------|-----------------------|-----------------------------------------|------------------------------------|
| Chelluri et al (26)          | ?                                                 | +                                            | +                                          | NA                                                               | -                                     | +                     | +                                       | +                                  |
| Broslawski et al (27)        | -                                                 | NA                                           | NA                                         | NA                                                               | NA                                    | +                     | +                                       | +                                  |
| Eddleston et al (28)         | -                                                 | -                                            | +                                          | NA                                                               | -                                     | +                     | +                                       | -                                  |
| Kress et al (49)             | ?                                                 | +                                            | +                                          | NA                                                               | -                                     | +                     | +                                       | -                                  |
| Jones et al (29)             | -                                                 | NA                                           | NA                                         | NA                                                               | -                                     | +                     | +                                       | ?                                  |
| Scragg et al (50) †          | -                                                 | NA                                           | NA                                         | NA                                                               | ++                                    | +                     | +                                       | -                                  |
| Chelluri et al (32) (55)     | +                                                 | NA                                           | NA                                         | NA                                                               | NA                                    | +                     | +                                       | +                                  |
| Jackson et al (30)           | +                                                 | +                                            | +                                          | NA                                                               | -                                     | +                     | +                                       | -                                  |
| Boyle et al (31)             | -                                                 | NA                                           | NA                                         | NA                                                               | -                                     | +                     | +                                       | -                                  |
| Rattray et al (33)           | +                                                 | NA                                           | NA                                         | NA                                                               | ++                                    | +                     | +                                       | +                                  |
| Weinert et al (34)           | +                                                 | NA                                           | NA                                         | +                                                                | ++                                    | +                     | +                                       | +                                  |
| Samuelson et al (35)         | +                                                 | NA                                           | NA                                         | NA                                                               | -                                     | +                     | +                                       | +                                  |
| Sukantarat et al (36)        | ?                                                 | NA                                           | NA                                         | NA                                                               | -                                     | +                     | +                                       | ?                                  |
| McWilliams et al (37)        | ?                                                 | NA                                           | +                                          | NA                                                               | NA                                    | +                     | +                                       | +                                  |
| Myhren et al (39)(56)        | -                                                 | NA                                           | NA                                         | NA                                                               | ++                                    | +                     | +                                       | -                                  |
| Van der Schaaf et al (38)    | -                                                 | NA                                           | NA                                         | NA                                                               | NA                                    | +                     | +                                       | -                                  |
| Rattray et al (40)           | +                                                 | NA                                           | NA                                         | NA                                                               | +                                     | +                     | +                                       | -                                  |
| Schandl et al (43)           | -                                                 | NA                                           | NA                                         | NA                                                               | +                                     | +                     | +                                       | -                                  |
| Garroute-Orgeas et al (41)   | +                                                 | NA                                           | +                                          | NA                                                               | -                                     | +                     | +                                       | -                                  |
| McKinley et al (42)          | -                                                 | NA                                           | NA                                         | NA                                                               | -                                     | +                     | +                                       | +                                  |
| Wade et al (44)              | +                                                 | NA                                           | NA                                         | NA                                                               | ++                                    | +                     | +                                       | +                                  |
| Davydow et al (45)           | -                                                 | NA                                           | NA                                         | NA                                                               | ++                                    | +                     | +                                       | +                                  |
| Kowalczyk et al (51) †       | -                                                 | NA                                           | NA                                         | NA                                                               | ++                                    | +                     | +                                       | -                                  |
| Raveau et al (46)            | +                                                 | NA                                           | NA                                         | NA                                                               | NA                                    | +                     | +                                       | +                                  |
| Risnes et al (54)*           | ?                                                 | ?                                            | +                                          | NA                                                               | -                                     | +                     | +                                       | ?                                  |
| Battle et al (53) †          | ?                                                 | NA                                           | NA                                         | -                                                                | ++                                    | +                     | +                                       | ?                                  |
| Jackson et al (47)           | -                                                 | NA                                           | NA                                         | NA                                                               | ++                                    | +                     | +                                       | +                                  |
| Paparrigopoulos et al (52) † | -                                                 | NA                                           | NA                                         | NA                                                               | ++                                    | +                     | +                                       | -                                  |
| Parsons et al (48)           | -                                                 | -                                            | +                                          | +                                                                | ++                                    | +                     | +                                       | +                                  |

**Legend:** "+" = low risk of bias; "?" = unclear risk of bias; "-" = high risk of bias; NA = not applicable; "†" = Cross-sectional studies; "\*" = case series

a: Consecutive screening of patients for enrollment and a ≥70% consent rate were required.

b: Only applicable for studies with a single pre-defined exposure.

c: Only applicable for studies with a single pre-defined exposure.

d: Only applicable for studies reporting incidence of depression.

e: Using multivariable regression module or 2-tailed ANOVA.

f: More than 2 weeks.

g: Lost to follow-up at the time of assessment <20% if before 6 months, and <30% if at 6 months or later (lost to follow-up was calculated by dividing the number of alive patients without depression assessments by total number of alive patients at that time point).

**Table S3: Study Characteristics. <sup>a</sup>**

| Study 1 <sup>st</sup> author        | Study type      | N   | Description of cohort               | Male (%) | Mean (SD) or median (IQR) [absolute range] |                  |             |                      |                      |
|-------------------------------------|-----------------|-----|-------------------------------------|----------|--------------------------------------------|------------------|-------------|----------------------|----------------------|
|                                     |                 |     |                                     |          | Age in years                               | Days in hospital | Days in ICU | APACHE II score      | Follow-up (mo.)      |
| Chelluri et al (26) <sup>b</sup>    | Cohort          | 97  | Age ≥ 65 yrs                        | 44       | 69 (2)                                     | 17 (16)          | 5 (7)       | 18 (6)               | 1,6,12               |
|                                     |                 |     |                                     | 52       | 81 (4)                                     | 21 (21)          | 7 (11)      | 20 (6)               |                      |
| Broslawski et al (27)               | Cohort          | 45  | Age > 65 yrs                        | 53       | 77 (7)                                     | 27 (29)          | 7 (8)       | 16 (7)               | 6                    |
| Eddleston et al (28)                | Cohort          | 143 | ICU admission                       | 52       | 49 (12)                                    | -                | 4 (2, 13)   | 19 (6)               | 3                    |
| Kress et al (49) <sup>c</sup>       | Cohort          | 105 | MV, received IV drip sedation       | 30       | 50 (16)                                    | 18 (13)          | 7 (6)       | 16 (6)               | 14                   |
|                                     |                 |     |                                     | 42       | 47 (20)                                    | 19 (10)          | 13 (10)     | 18 (7)               |                      |
| Jones et al (29)                    | Cohort          | 45  | ICU LOS ≥ 24 hrs, MV                | 44       | 57                                         | -                | 8           | 17                   | 2                    |
| Scragg et al (50)                   | Cross Sectional | 80  | ICU survivor                        | 53       | 57                                         | -                | [1-33]      | -                    | 13 (6)               |
| Chelluri et al (32)(55)             | Cohort          | 817 | MV ≥ 48 hrs                         | 54       | 60 (19)                                    | 20 (13, 31)      | 11 (6, 19)  | 68 (28) <sup>d</sup> | 2, 12                |
| Jackson et al (30)                  | Cohort          | 34  | MV                                  | 53       | 53 (15)                                    | -                | -           | 25 (9)               | 6                    |
| Jones et al (17) <sup>c</sup>       | RCT             | 126 | MV, ICU LOS > 48 hrs                | 54       | 57 (17)                                    | -                | 14 (20)     | 17 (5)               | 2, 6                 |
|                                     |                 |     |                                     | 58       | 59 (16)                                    |                  | 13 (18)     | 16 (5)               |                      |
| Boyle et al (31)                    | Cohort          | 99  | ICU LOS ≥ 48 hrs                    | 63       | 59 (15)                                    | 26 (30)          | 7 (6)       | 16 (7)               | 1,6                  |
| Rattray et al (33)                  | Cohort          | 109 | ICU LOS ≥ 24 hrs                    | 64       | 55 (18)                                    | 30 (14, 57)      | 6 (2, 13)   | 18 (5)               | 6,12                 |
| Weinert et al (34)                  | Cohort          | 277 | MV > 36 hrs                         | 52       | 54 (47, 63)                                | 22               | -           | -                    | 2,6                  |
| Samuelson et al (35)                | Cohort          | 250 | MV, ICU LOS ≥ 24 hrs                | 52       | 63 (13)                                    | -                | 6 (6)       | 18                   | 2                    |
| Sukantarat et al (36)               | Cohort          | 51  | ICU LOS ≥ 72 hrs                    | 43       | 57 (14)                                    | -                | 17 (17)     | 15 (6)               | 3,9                  |
| McWilliams et al (37)               | Cohort          | 43  | MV ≥ 48 hrs, E: terminally ill      | 55       | 57(17)                                     | 39 (31, 45)      | 11 (6, 17)  | 15 (11, 22)          | 1 w, 2               |
| Cuthbertson et al (18) <sup>c</sup> | RCT             | 286 | Survived to hospital d/c            | 60       | 59 (46, 49)                                | -                | 3 (2, 10)   | 19 (15, 24)          | 6,12                 |
|                                     |                 |     |                                     | 60       | 60 (46, 71)                                |                  | 3 (1, 8)    | 19 (15, 24)          |                      |
| Knowles et al (19) <sup>c</sup>     | RCT             | 36  | ICU LOS ≥ 48 hrs;<br>Age 18-85 yrs, | 56       | -                                          | -                | 10          | 17                   | 1 [1-8],<br>2 [2-10] |
|                                     |                 |     |                                     | 61       | -                                          |                  | 8           | 14                   |                      |
| Myhren et al (39)(56)               | Cohort          | 255 | ICU LOS ≥ 24 hrs; Age 18-75         | 63       | 48 (16)                                    | -                | 12 (14)     | -                    | 1,3,12               |
| Peek et al (20) <sup>c</sup>        | RCT             | 180 | Severe respiratory failure          | 57       | 40 (13)                                    | 35 (16, 74)      | 24 (13, 41) | 20 (6)               | 6                    |
|                                     |                 |     |                                     | 59       | 40 (13)                                    | 17 (5, 45)       | 13 (11, 16) | 20 (6)               |                      |
| Treggiari et al (21) <sup>c</sup>   | RCT             | 137 | MV ≥ 12 hrs                         | 75       | 63 (16)                                    | 16 (13, 33)      | 4           | 60 (28) <sup>d</sup> | 1                    |
|                                     |                 |     |                                     | 78       | 60 (16)                                    | 20 (13, 38)      | 6           | 60 (27) <sup>d</sup> |                      |
| Van der Schaaf et al (38)           | Cohort          | 255 | ICU LOS ≥ 48 hrs                    | 66       | 59 (16)                                    | -                | 9 (10)      | 15 (6)               | 12                   |
| Jackson et al (22) <sup>c</sup>     | RCT             | 180 | MV ≥ 12 hrs                         | 54       | 65 (53, 73)                                | -                | -           | 28 (22, 34)          | 3, 12                |
|                                     |                 |     |                                     | 45       | 68 (56, 76)                                |                  |             | 28 (21, 33)          |                      |
| Rattray et al (40)                  | Cohort          | 103 | MV, ICU LOS ≥ 24 hrs                | 63       | 60                                         | 13 (0, 368)      | 7 (0, 63)   | 19                   | 2,6                  |

**Table S3: Study Characteristics. (Continued)**

| Study 1 <sup>st</sup> author             | Study type      | N   | Description of cohort                         | Male (%)             | Mean (SD) or median (IQR) [absolute range] |                                            |                                |                                        |                 |
|------------------------------------------|-----------------|-----|-----------------------------------------------|----------------------|--------------------------------------------|--------------------------------------------|--------------------------------|----------------------------------------|-----------------|
|                                          |                 |     |                                               |                      | Age in years                               | Days in hospital                           | Days in ICU                    | APACHE II score                        | Follow-up (mo.) |
| Strøm et al (23) <sup>c</sup>            | RCT             | 113 | MV ≥ 24 hrs,<br>E: needing sedation           | 31<br>38             | 71 (58, 74)<br>63 (56, 67)                 | -                                          | -                              | 20 (16, 29)<br>25 (21, 26)             | 24              |
| Garrouste-Orgeas et al (41) <sup>e</sup> | Cohort          | 143 | ICU LOS ≥ 96 hrs                              | 52<br>67<br>54       | 68 (14)<br>65 (17)<br>62 (16)              | 35 (67) <sup>f</sup><br>20 (30)<br>14 (19) | 21 (16)<br>18 (23)<br>13 (18)  | -                                      | 3               |
| McKinley et al (42)                      | Cohort          | 195 | ICU LOS ≥48 hrs, MV ≥24 hrs                   | 21                   | 57 (16)                                    | 18 (12, 29)                                | 6 (4-11)                       | 19 (7)                                 | 1wks, 2, 7      |
| Schandl et al (43) <sup>g</sup>          | Cohort          | 258 | ICU LOS ≥ 96 hrs                              | 65<br>63             | 53(17); 52(18)<br>52(17); 54(21)           | -                                          | 11 (7); 10 (7)<br>9 (7); 9 (8) | 23 (9); 21 (8)<br>21(8);19 (10)        | 3,6,12,14       |
| Wade et al (44)                          | Cohort          | 157 | MV>24 hrs or ≥2 organ support                 | 52                   | 57 (17)                                    | 27                                         | 8                              | 22 (7)                                 | 3               |
| Davydow et al (45)                       | Cohort          | 150 | ICU LOS ≥ 24 hrs                              | 58                   | 49 (15)                                    | 17 (12)                                    | 8 (8)                          | -                                      | 3,12            |
| Kowalczyk et al (51)                     | Cross Sectional | 195 | survived ≥ 24 hrs in ICU                      | 58                   | 48 (19)                                    | -                                          | 18 (24)                        | 15 (7)                                 | 60              |
| Raveau et al (46)                        | Cohort          | 52  | Age ≥ 75 yrs                                  | 67                   | 81 (78, 83)                                | 16 (9, 28)                                 | 6 (13, 10)                     | -                                      | 3               |
| Risnes et al (54)                        | Case-Series     | 28  | ECMO                                          | 46                   | 38 [19 - 64]                               | -                                          | -                              | -                                      | 60              |
| Jackson et al (47)                       | Cohort          | 826 | Respiratory failure or shock                  | 50                   | 59 (49, 69)                                | 10 (6, 18)                                 | 5 (3, 10)                      | 24 (19, 30)                            | 3,12            |
| Paparrigopoulos et al (52)               | Cross sectional | 48  | ICU LOS ≥ 24 hrs                              | 69                   | 53 (3)                                     | 36 (8) <sup>f</sup>                        | 13 (3)                         | 12 (5)                                 | 21 (3)          |
| Battle et al (53)                        | Cross sectional | 63  | ICU LOS ≥ 96 hrs                              | 56                   | 66 (49, 76)                                | -                                          | 7 (4, 19)                      | 17 (11, 20)                            | 3               |
| Jones et al (24) <sup>c</sup>            | RCT             | 93  | Age ≥ 45 yrs,<br>pre-ICU or ICU LOS ≥ 5 d     | 50<br>64<br>64<br>48 | 60<br>64<br>64<br>62                       | -                                          | 10<br>8<br>13<br>13            | 14 (4)<br>17 (10)<br>18 (6)<br>14 (10) | 3               |
| Parsons et al (48) <sup>h</sup>          | Cohort          | 150 | ICU LOS ≥ 24 hrs,<br>E: life expectancy <12 m | 45<br>41             | 48 (13)<br>48 (14)                         | 15 (8, 23)<br>16 (10, 24)                  | 5 (2, 9)<br>5 (3, 9)           | -                                      | 12              |
| Walsh et al (25) <sup>c</sup>            | RCT             | 240 | MV ≥ 48 hrs                                   | 56<br>58             | 62 (51, 71)<br>62 (53, 69)                 | 11 (6, 22) <sup>f</sup><br>10 (6, 23)      | 11 (6, 18)<br>11 (6, 18)       | 20 (17, 24)<br>19 (15, 26)             | 3,6,12          |

**Abbreviations:** N: number enrolled; APACHE II: acute physiology and chronic health evaluation II score; d: days; d/c: discharge; hrs: hours; ICU: intensive care unit; IQR: interquartile range; LOS: length-of-stay; mo.: months; MV: mechanical ventilation; ECMO: Extracorporeal membrane oxygenation; "-": not reported; E: excluding

a: When study characteristics of the responders at follow-up were not available we used characteristics of the entire cohort enrolled in the study.

b: Patients aged 65-74 yrs vs patients aged ≥ 75 yrs.

c: Intervention group vs control group.

d: APACHE III.

e: Pre-ICU diary vs ICU diary vs post-ICU diary.

f: Post-ICU hospital LOS.

g: Follow-up group (men; women) vs control group (men; women).

h: Patients with insomnia vs patients without insomnia.

**Table S4. Risk of Bias Assessment For Randomized Controlled Trials.**

| Study                  | Random sequence generation (selection bias) | Allocation concealment (selection bias) | Blinding of participants and personnel (performance bias) | Blinding of outcome assessment (detection bias) | Incomplete outcome data addressed (attrition bias) | Selective reporting (reporting bias) |
|------------------------|---------------------------------------------|-----------------------------------------|-----------------------------------------------------------|-------------------------------------------------|----------------------------------------------------|--------------------------------------|
| Jones et al (17)       | +                                           | +                                       | +                                                         | +                                               | +/-                                                | +                                    |
| Cuthbertson et al (18) | +                                           | +                                       | -                                                         | -                                               | +                                                  | +                                    |
| Knowles et al (19)     | ?                                           | +                                       | -                                                         | -                                               | +                                                  | +                                    |
| Peek et al (20)        | +                                           | ?                                       | -                                                         | +                                               | -                                                  | +                                    |
| Treggiari et al (21)   | +                                           | +                                       | -                                                         | +                                               | -                                                  | -                                    |
| Jackson et al (22)     | +                                           | +                                       | -                                                         | +                                               | -                                                  | +                                    |
| Strøm et al (23)       | ?                                           | +                                       | -                                                         | +                                               | -                                                  | +                                    |
| Jones et al (24)       | +                                           | +                                       | -                                                         | +                                               | -                                                  | +                                    |
| Walsh et al (25)       | +                                           | +                                       | -                                                         | +/-                                             | +                                                  | +                                    |

**Legend:** Based on Cochrane criteria for assessing risk of bias in randomized controlled trials. "+" low risk of bias; "-" means high risk of bias; "?" means unclear risk of bias; "+/-" means results were low risk for the first time point but high risk for the subsequent ones
